# Supplementary material for: Insights into Li+-induced morphology evolution and upconversion luminescence enhancement of KSc2F7:Yb/Er nanocrystals
Source: Royal Society of Chemistry journal article supplement (doi:10.1039/c7tc00649g), 2017-01-01
Supplement: c7tc00649g1.pdf [file c7tc00649g1.pdf]

## SUPPORTING INFORMATION

### Insights into Li<sup>+</sup>-induced morphology evolution and upconversion luminescence enhancement of KSc<sub>2</sub>F<sub>7</sub>:Yb/Er nanocrystals

Yangbo Wang,<sup>a</sup> Tian Wei,<sup>a</sup> Xingwen Cheng,<sup>a</sup> Yue Pan,<sup>b</sup> Hui Ma,<sup>a</sup> Juan Xie,<sup>c</sup> Haiquan Su,<sup>b</sup> Xiaoji Xie,<sup>\*a</sup> Ling Huang<sup>\*a</sup> and Wei Huang<sup>\*ac</sup>

<sup>a</sup>*Key Laboratory of Flexible Electronics (KLOFE) & Institute of Advanced Materials (IAM), Jiangsu National Synergetic Innovation Center for Advanced Materials (SICAM), Nanjing Tech University (NanjingTech), 30 South Puzhu Road, Nanjing 211816, P. R. China. E-mail: iamxjxie@njtech.edu.cn, iamlhuang@njtech.edu.cn, iamwhuang@njtech.edu.cn*

<sup>b</sup>*School of Chemistry and Chemical Engineering, Inner Mongolia University, 235 West Daxue Road, Hohhot 010021, P. R. China*

<sup>c</sup>*Key Laboratory for Organic Electronics and Information Displays & Institute of Advanced Materials (IAM), Jiangsu National Synergetic Innovation Center for Advanced Materials (SICAM), Nanjing University of Posts & Telecommunications, 9 Wenyuan Road, Nanjing 210023, P. R. China.*

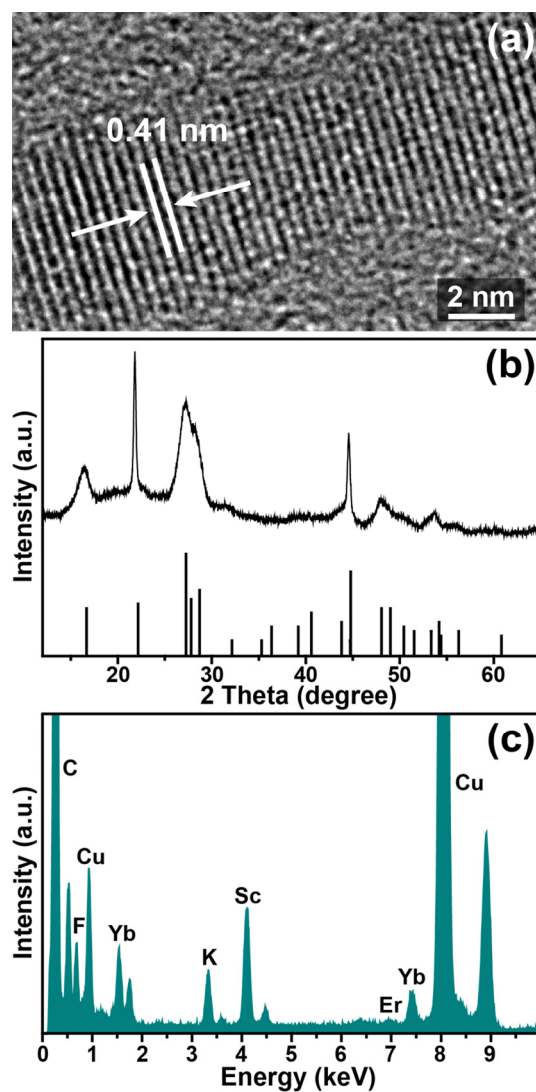

**Fig. S1** (a) HRTEM image and (b) XRD of the as-synthesized KSc<sub>2</sub>F<sub>7</sub>:Yb/Er nanocrystals. The diffraction pattern at the bottom is the literature reference of orthorhombic KSc<sub>2</sub>F<sub>7</sub> crystal (JCPDS: 39-0784). (c) The energy-dispersive X-ray spectrum of the as-synthesized KSc<sub>2</sub>F<sub>7</sub>:Yb/Er nanocrystals, proving the presence of K, Sc, F, Yb and Er.

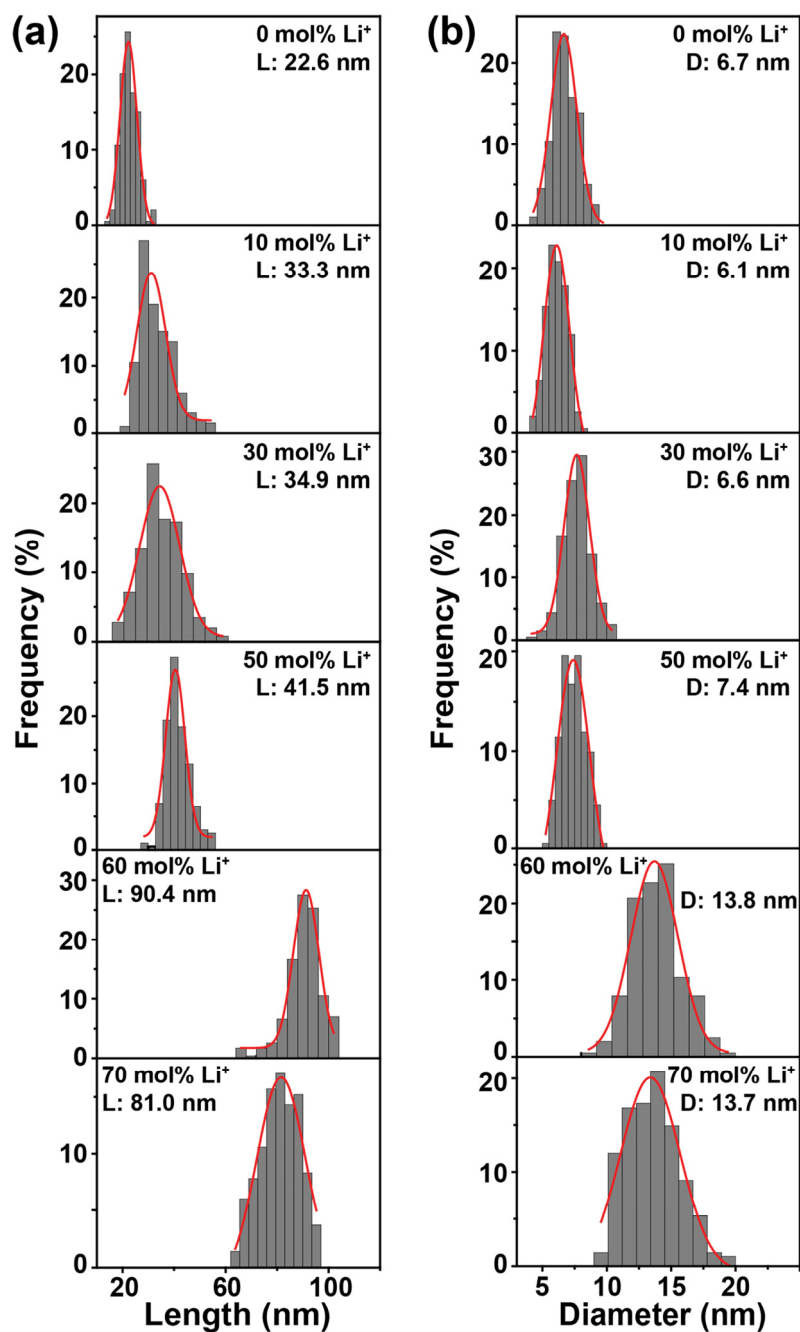

**Fig. S2** The (a) length and (b) diameter distributions of KSc<sub>2</sub>F<sub>7</sub>:Yb/Er nanocrystals doped with varied amounts of Li<sup>+</sup> (0-70 mol%). L and D represent length and diameter, respectively.

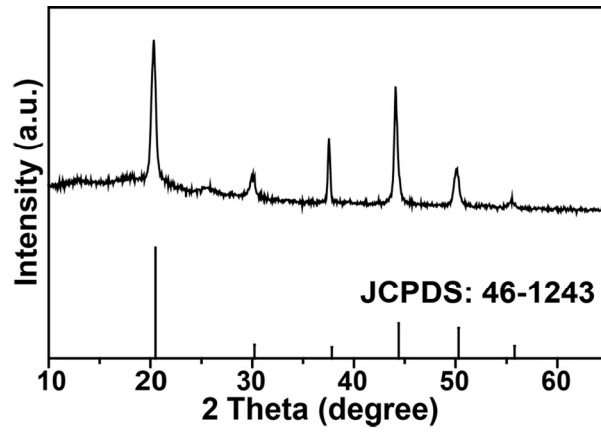

**Fig. S3** (a) XRD pattern of KSc<sub>2</sub>F<sub>7</sub>:Yb/Er nanocrystals doped with 80 mol% Li<sup>+</sup>. The diffraction pattern at the bottom is the literature reference of cubic ScF<sub>3</sub> crystal (JCPDS: 46-1243).

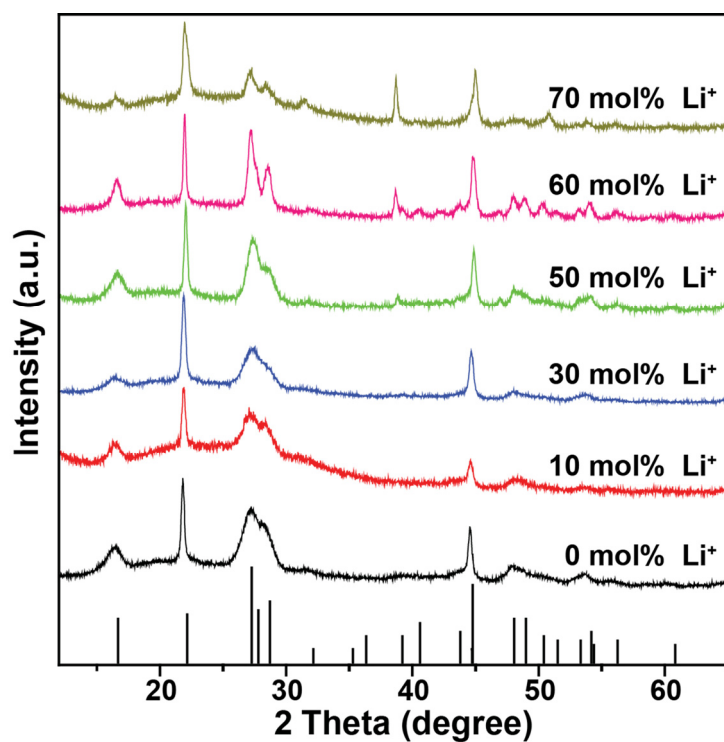

**Fig. S4** XRD patterns of  $\text{KSc}_2\text{F}_7:\text{Yb/Er}$  nanocrystals doped with varied amounts of  $\text{Li}^+$  (0-70 mol%). The diffraction pattern at the bottom is the literature reference of orthorhombic  $\text{KSc}_2\text{F}_7$  crystal (JCPDS: 39-0784).

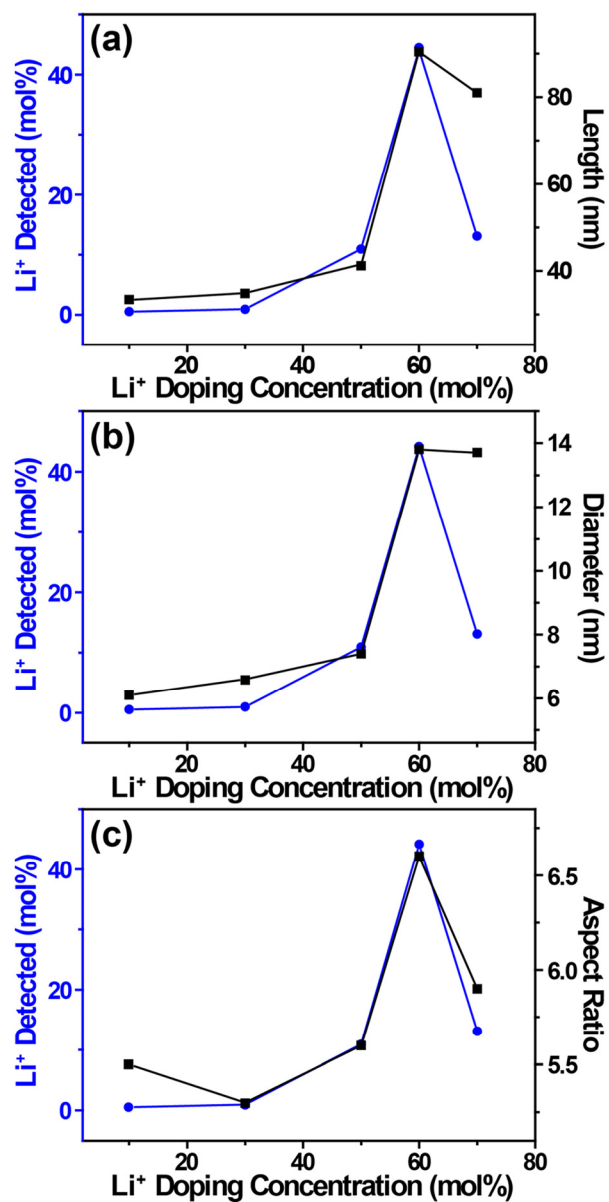

**Fig. S5** The amount of  $\text{Li}^+$  detected in the  $\text{KSc}_2\text{F}_7$  nanocrystals and the (a) length, (b) diameter, and (c) aspect ratio of the corresponding nanocrystals as a function of  $\text{Li}^+$  doping concentration.

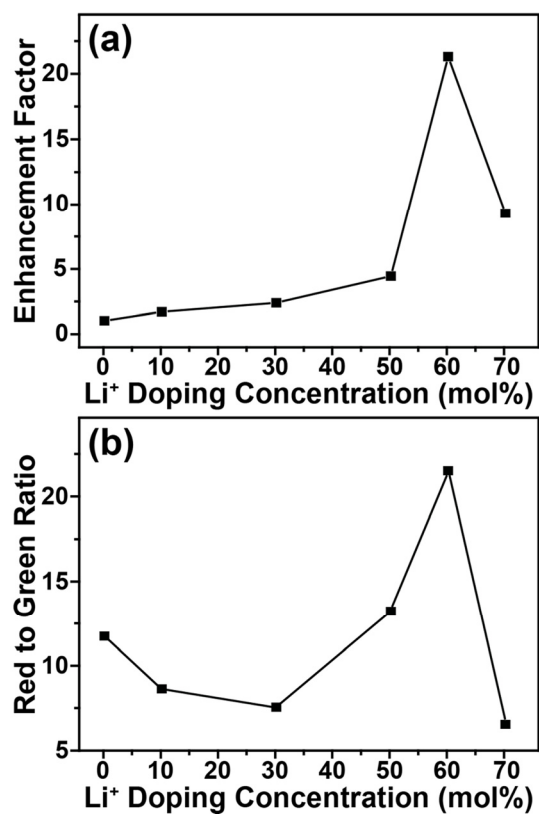

**Fig. S6** (a) Relative enhancement of upconversion emission as a function of Li<sup>+</sup> doping concentration. The emission intensity of KSc<sub>2</sub>F<sub>7</sub> nanocrystals without Li<sup>+</sup> doping was set as 1. (b) Red to green emission intensity ratio as a function of Li<sup>+</sup> doping concentration.

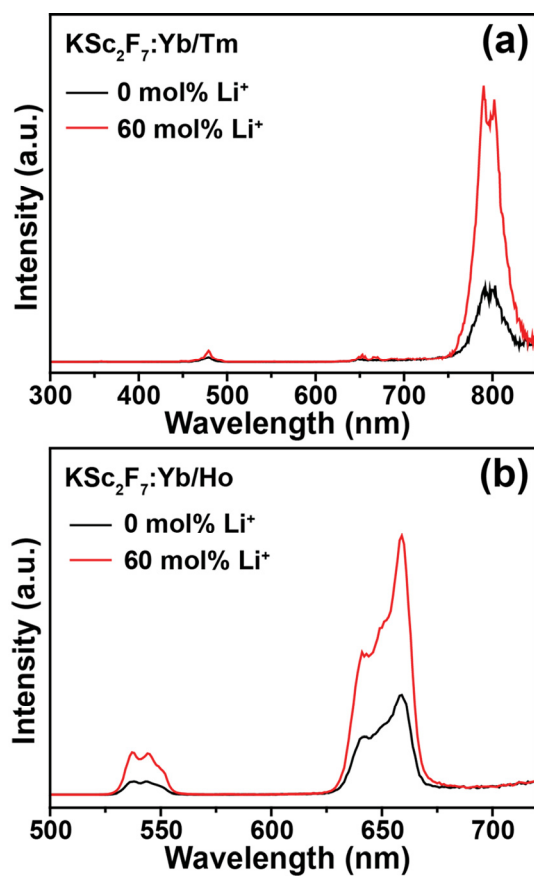

**Fig. S7** Photoluminescence spectra of (a)  $\text{KSc}_2\text{F}_7:\text{Yb}/\text{Tm}$  (20/0.5 mol%) and (b)  $\text{KSc}_2\text{F}_7:\text{Yb}/\text{Ho}$  (20/2 mol%) nanocrystals without and with 60 mol%  $\text{Li}^+$  doping under the excitation of a 980 nm laser.



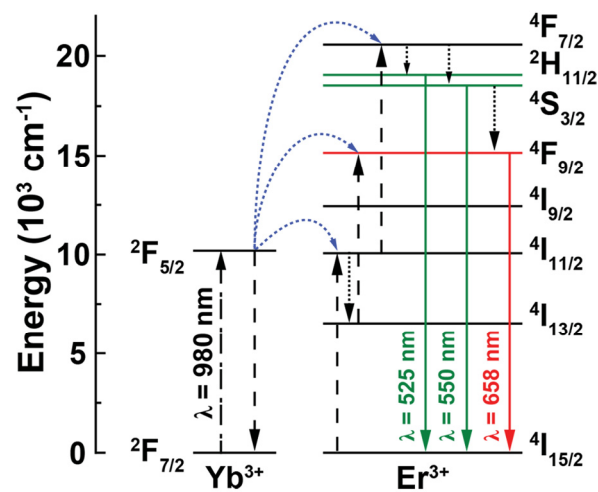

**Fig. S8** Proposed upconversion mechanism under 980 nm laser excitation in  $\text{KSc}_2\text{F}_7:\text{Yb}/\text{Er}$  nanocrystals. The dash, dotted, dash-dotted and full arrows represent energy transfer, multiphonon relaxation, excitation, and emission process, respectively.

**Table S1** Luminescent lifetime of  $^4F_{9/2}$  state of  $Er^{3+}$  ions in  $KSc_2F_7:Yb/Er$  nanocrystals

| Li <sup>+</sup> doped (mol%) | $\tau_{eff}$ ( $\mu s$ ) |
|------------------------------|--------------------------|
| 0                            | 56.7                     |
| 10                           | 87.0                     |
| 30                           | 161.6                    |
| 50                           | 260.8                    |
| 60                           | 462.5                    |
| 70                           | 315.1                    |

The effective luminescent lifetime ( $\tau_{eff}$ ) was calculated by:

$$\tau_{eff} = \frac{1}{I_0} \int_0^{\infty} I(t) dt$$

where  $I_0$  is the maximum intensity, and  $I(t)$  is the luminescent intensity as a function of time  $t$ .
